# Supplementary material for: Deregulated FADD expression and phosphorylation in T-cell lymphoblastic lymphoma
Source: PubMed Central journal article supplement (PMC5308666; doi:10.18632/oncotarget.11370), 2016-08-18
Supplement: oncotarget-07-61485-s001.pdf [file oncotarget-07-61485-s001.pdf]

## Deregulated FADD expression and phosphorylation in T-cell lymphoblastic lymphoma

### Supplementary Materials

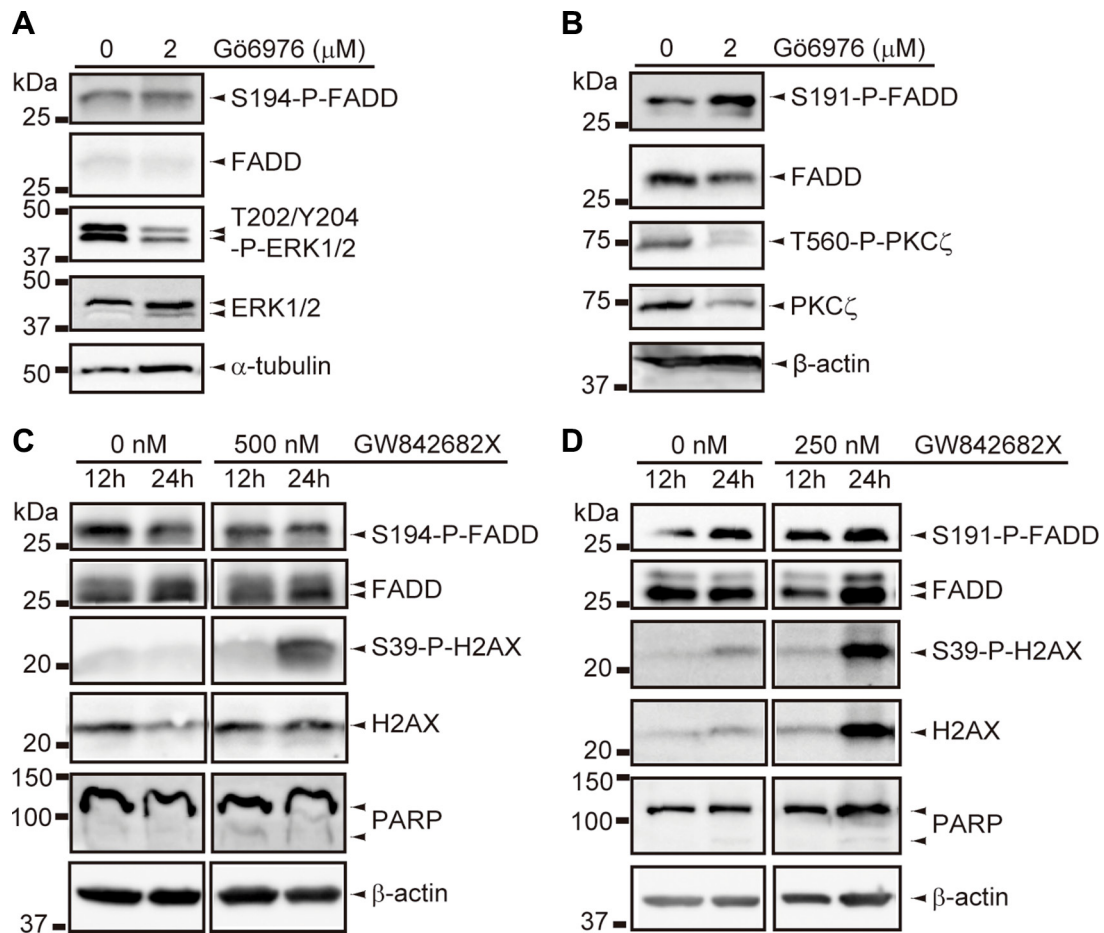

**Supplementary Figure S1: Inhibition assays for PKC $\zeta$  and PLK1.** (A, B) Assessment of FADD phosphorylation in JURKAT (A) and BW5147.3 (B) cell lines, upon inhibition of PKC $\zeta$  by Gö6976-treatment for 12 h and 6 h, respectively, and the indicated doses. Inhibition was validated based on decrease of T202/Y204-P-ERK1/2 (A) or T560-P-PKC $\zeta$  levels (B). (C, D) Assessment of FADD phosphorylation in JURKAT (C) and BW5147.3 (D) cell lines, upon inhibition of PLK1 by GW842682X-treatment for 12 h and 24 h and the indicated doses. Inhibition was validated based on increase in S139-P-H2A.X level, together with PARP proteolysis. All WB images are cropped in favor of conciseness.

**Supplementary Table S1: List of primers**

| Application | Gene/Target          | Name      | Sequence (5'–3')           |
|-------------|----------------------|-----------|----------------------------|
| qPCR        | <i>Fadd</i>          | Forward   | CGCCGACACGATCTACTGCA       |
|             |                      | Reverse   | CAGACACCTTCAGCTCGCGG       |
|             | <i>Ahr</i>           | Forward   | GCACAAGGAGTGGACGAAG        |
|             |                      | Reverse   | AGGAAGCTGGTCTGGGGTAT       |
|             | <i>G6pd</i>          | Forward   | ACGACATCCGAAAGCAGAGT       |
|             |                      | Reverse   | CATAGGAATTACGGGCAAAGA      |
|             | <i>Hprt</i>          | Forward   | TCCTCCTCAGACCGCTTTT        |
|             |                      | Reverse   | CCTGGTTCATCATCGCTAAT       |
| PCR         | <i>Fadd cDNA</i>     | Forward   | GGTACCGATTCCTATGTGGGATCGC  |
|             |                      | Reverse   | CTCGAGTCCGGGTGTTTCTGAGGAAG |
|             | <i>Fadd Promoter</i> | Forward   | CAAAGCCCCTGGAAGTGGAA       |
|             |                      | Reverse   | TTTACTCCACAGGCCCTCCAG      |
| Sequencing  | <i>Fadd cDNA</i>     | Forward   | TATGTGGGATCGCTGAGGGG       |
|             |                      | Reverse   | AGACACAGTTGAATCCCTTA       |
|             | <i>Fadd Promoter</i> | Forward-1 | CCAGCCCATAAGTAACTCCATCCA   |
|             |                      | Forward-2 | CGCCCACTTTTTTCAACCGC       |
|             |                      | Reverse-1 | GCCCTCCAGCTGCTTTGATG       |
|             |                      | Reverse-2 | CAGTAGATCGTGTCGGCGCA       |

The table indicates the sequence of each primer used for quantitative PCR, standard PCR or sequencing of different genes or target sequences.

**Supplementary Table S2: List of antibodies used for immunodetection.** The table indicates the techniques and proteins detected with each antibody, and details on their origin and use. O/N, overnight. RT, room temperature. See Supplementary\_Table\_S2
